# Supplementary figures and images for: Unique Role of Histone Methyltransferase PRDM8 in the Tumorigenesis of Virus-Negative Merkel Cell Carcinoma
Source: MDPI journal article supplement (doi:10.3390/cancers12041057), 2020-04-24

Western blot images:

Fig. 2E

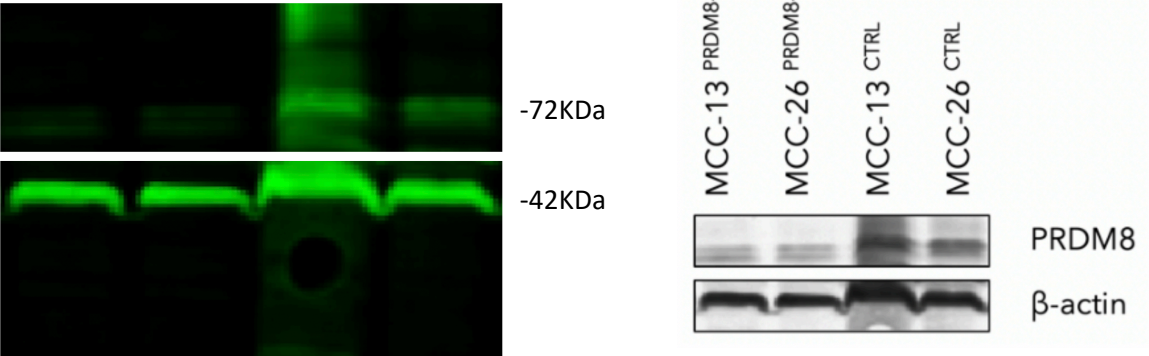

Fig. 4E

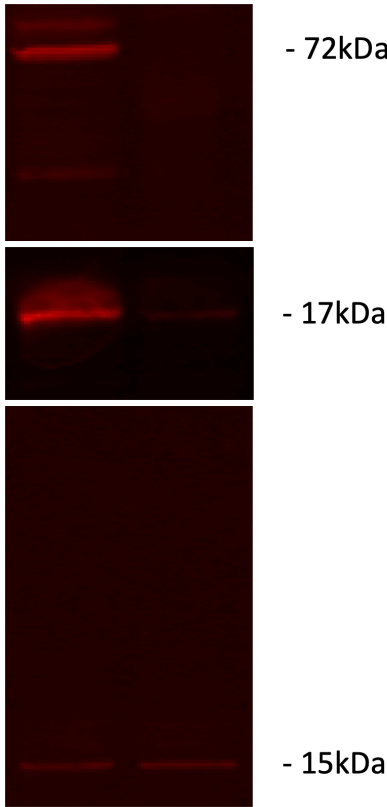

Suppl. Fig. 1A

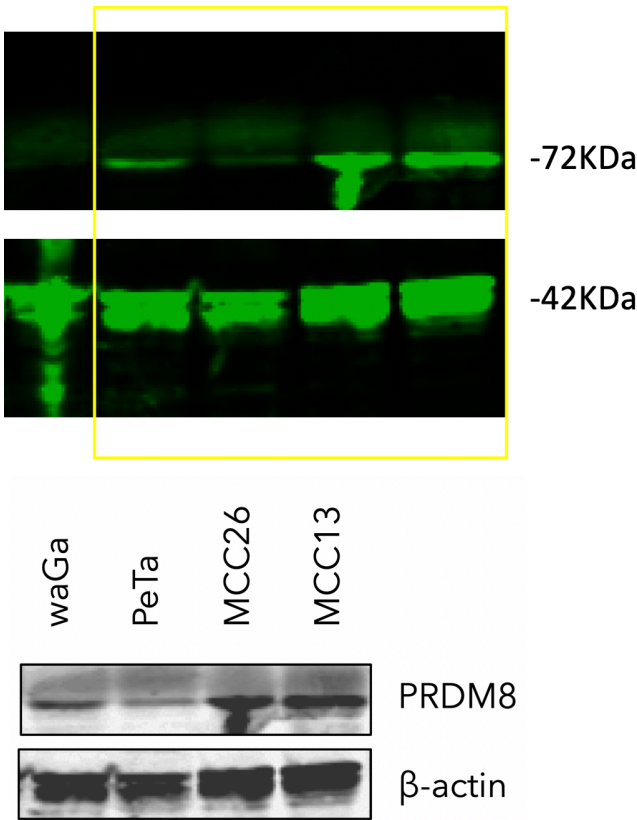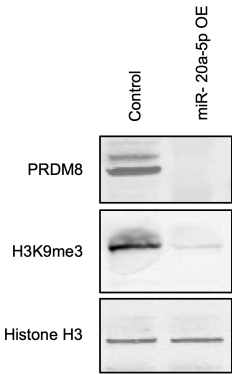

Suppl. Fig. 1B

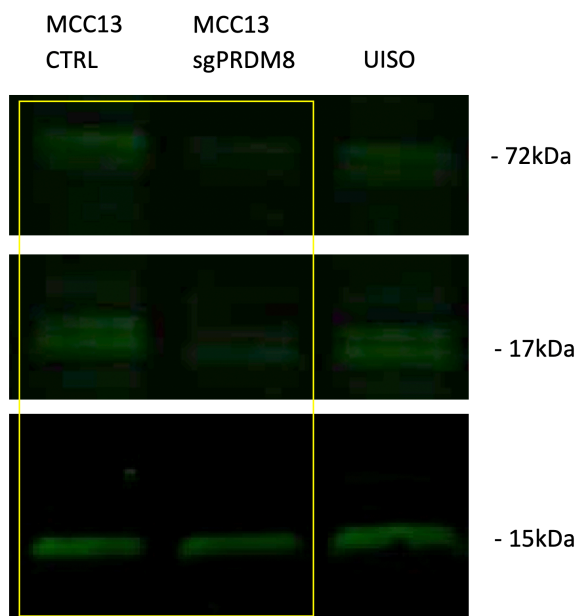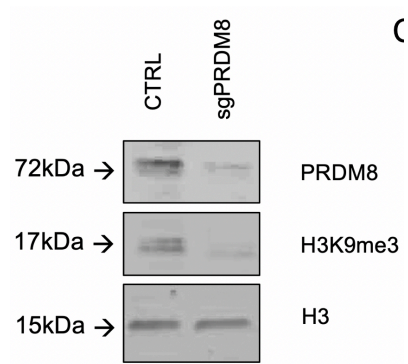

Densitometry for Suppl. Figures:

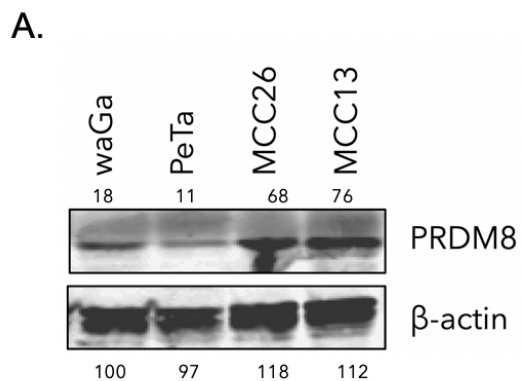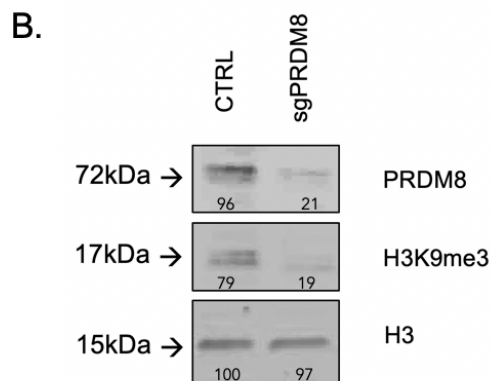

Supplement: s1 [file s1]
